# Supplementary material for: Efficient sky-blue radioluminescence of microcrystalline Cs3Cu2I5 based large-scale eco-friendly composite scintillators for high-sensitive ionizing radiation detection
Source: Royal Society of Chemistry journal article supplement (doi:10.1039/d1qm00356a), 2021-01-01
Supplement: d1qm00356a1.pdf [file d1qm00356a1.pdf]

## Supporting Information

### **Efficient sky-blue radioluminescence of microcrystalline Cs<sub>3</sub>Cu<sub>2</sub>I<sub>5</sub> based large-scale eco-friendly composite scintillators for high-sensitive ionizing radiation detection**

*Xiao Ouyang<sup>1</sup>, Richeng Lin<sup>2</sup>, Ying Ding<sup>2</sup>, Yali Liang<sup>2</sup>, Wei Zheng<sup>\*,2</sup>, Liang Chen<sup>3</sup>,*

*Xiaojing Song<sup>3</sup>, Xiaoping Ouyang<sup>\*,3</sup>, Feng Huang<sup>\*,2</sup>*

<sup>1</sup> Key Laboratory of Beam Technology of Ministry of Education, College of Nuclear Science and Technology, Beijing Normal University, Beijing 100875, China

<sup>2</sup> State Key Laboratory of Optoelectronic Materials and Technologies, School of Materials, Sun Yat-sen University, Guangzhou 510275, China

<sup>3</sup> State Key Laboratory of Intense Pulsed Radiation Simulation and Effect, Northwest Institute of Nuclear Technology, Xi'an, Shanxi 710024, China

\*Corresponding author (email: [zhengw37@mail.sysu.edu.cn](mailto:zhengw37@mail.sysu.edu.cn), [oyxp2003@aliyun.com](mailto:oyxp2003@aliyun.com), [huangfeng@mail.sysu.edu.cn](mailto:huangfeng@mail.sysu.edu.cn) )

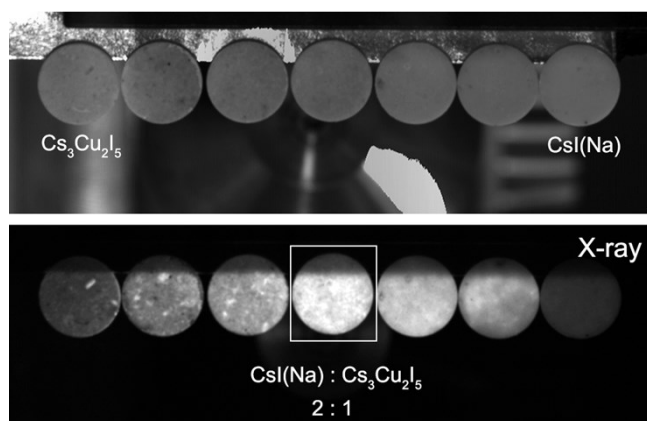

**Fig. S1.** Ultraviolet-enhanced photos of fluorescent flakes prepared in different mixing ratios of  $\text{CsI}(\text{Na})$  and  $\text{Cs}_3\text{Cu}_2\text{I}_5$  when X-rays are turned off (top) and on (bottom).

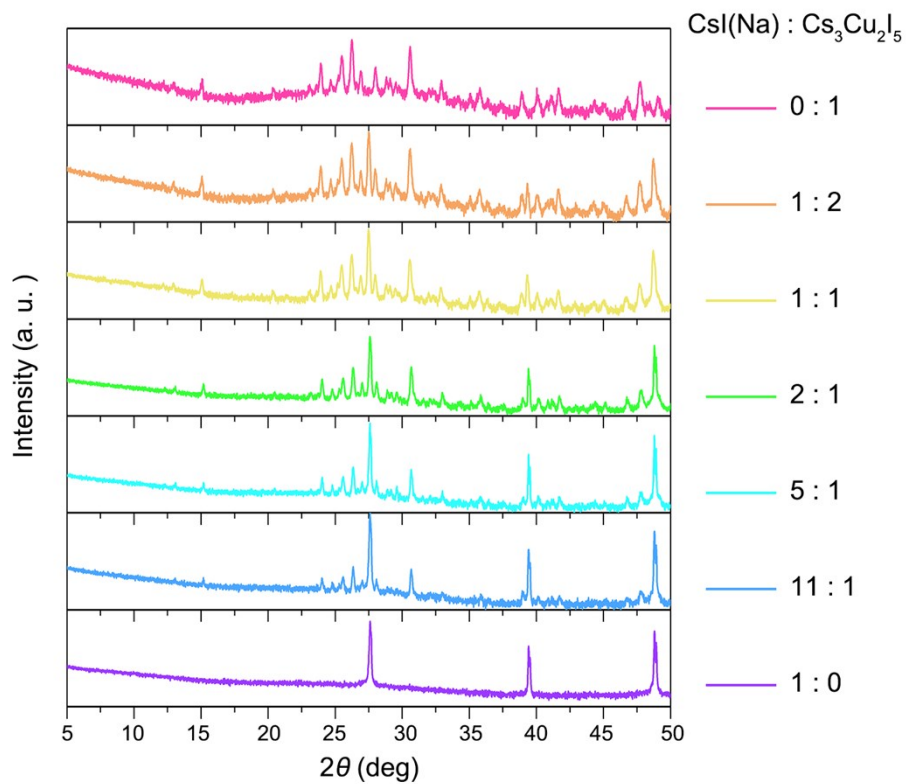

**Fig. S2.** XRD spectra of fluorescent flakes prepared in different mixing ratios of CsI(Na) and Cs<sub>3</sub>Cu<sub>2</sub>I<sub>5</sub>.

**Table S1.** A comparison between the composite scintillator obtained in this work and commercial CsI:Na and CsI:Tl single crystals in the aspects of RL intensity and light yield. .

|                                            | This work<br>CsI:Na+Cs <sub>3</sub> Cu <sub>2</sub> I <sub>5</sub><br>presser | CsI:Na presser | Commercial<br>CsI:Na crystal | Commercial<br>CsI:Tl crystal |
|--------------------------------------------|-------------------------------------------------------------------------------|----------------|------------------------------|------------------------------|
| RL intensity<br>(Counts)                   | 3651                                                                          | 637            | 1520                         | 3430                         |
| Light yield<br>(photon MeV <sup>-1</sup> ) | 57.5k                                                                         | 10.0k          | 24.0k                        | 54.0k                        |
